# Supplementary material
Source: MDPI journal article supplement (https://www.mdpi.com/2079-6412/14/4/504)
Supplement: s1 [file s1]

# Design and Preparation of Bending-Resistant Flexible All-Solid Dye-Sensitized Solar Cells

**Yan Li<sup>1,2,\*</sup>, Yu-Xuan Hou<sup>1,2</sup>, Wei-Wu Dang<sup>3</sup>, Li Liu<sup>1,2</sup>, Jian-Hua Chen<sup>2</sup>, Xian Gu<sup>2</sup>**

<sup>1</sup> Key Laboratory of Functional Materials and Devices for Informatics of Anhui Higher Education Institutes, Fuyang Normal University, Fuyang, 236037, China

<sup>2</sup> College of New Energy, Xi'an Shiyou University, Xi'an 710065, China

<sup>3</sup> College of Intelligent Manufacturing, Shaanxi Institute of Technology, Xi'an 710300, China

\* Correspondence: li1988yan@163.com

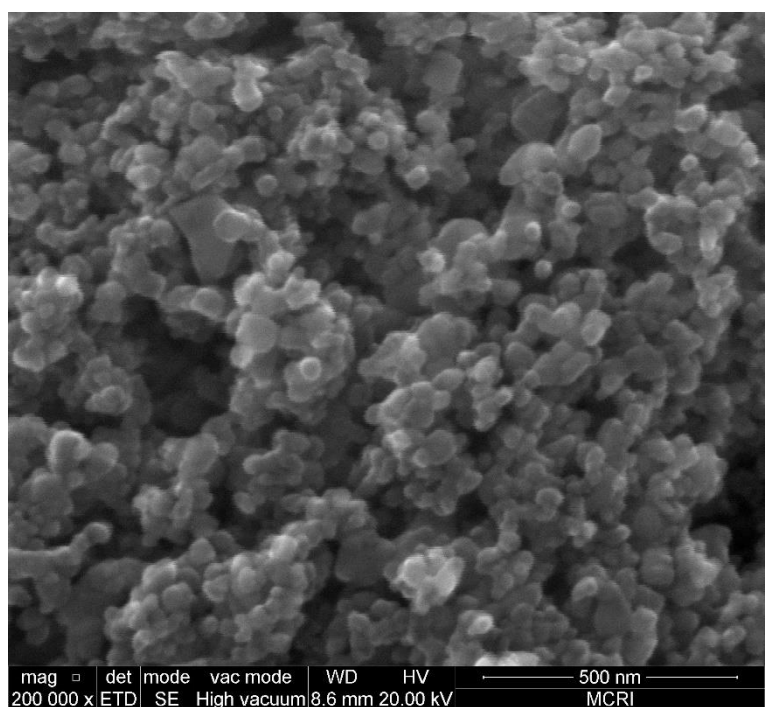

Figure S1. The high magnification SEM morphology data of the dual-porous film.
